# Supplementary material
Source: PubMed Central journal article supplement (PMC2823559)
Supplement: supp_M109.040444_jbc.M109.040444-1.pdf [file supp_M109.040444_jbc.M109.040444-1.pdf]

## Supplemental data

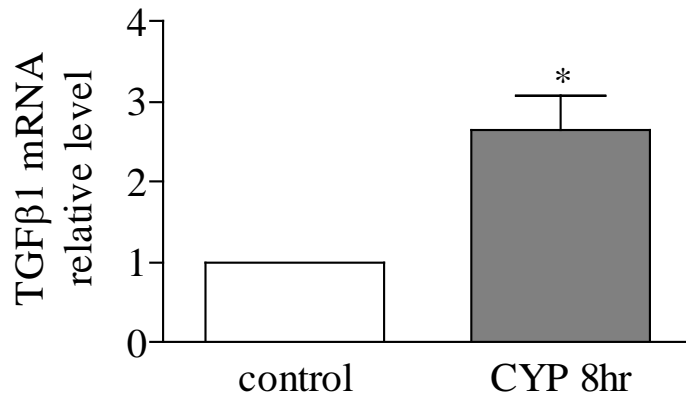

**Supplemental Figure.** *Increases in the level of TGFβ1 mRNA expression in the urinary bladder following CYP-induced cystitis.* After CYP treatment for 8 hr, the urinary bladder was homogenized for RNA extraction. Real-time PCR results showed that the TGFβ1 mRNA level was increased in the inflamed urinary bladder when compared to control. Results were presented as mean ± SE from 4 animals at each time point. \*,  $p < 0.01$ .
